# Supplementary material for: Insights into Circovirus Host Range from the Genomic Fossil Record
Source: PubMed Central journal article supplement (PMC6069186; doi:10.1128/jvi.00145-18), 2018-07-31
Supplement: JVI.00145-18_zjv016183759s1.pdf [file JVI.00145-18_zjv016183759s1.pdf]

**Table S1. Circovirus and Cyclovirus reference sequences**

| Accession #         | Virus name                                              | Citation* |
|---------------------|---------------------------------------------------------|-----------|
| <b>Circovirus</b>   |                                                         |           |
| NC_001944           | Beak and feather disease virus                          | (1)       |
| NC_002361           | Columbid circovirus                                     | (2)       |
| NC_003410           | Canary circovirus                                       | (3)       |
| NC_008033           | Starling circovirus (StCV)                              | (4)       |
| NC_008375           | Raven circovirus                                        | (5)       |
| NC_008521           | Gull circovirus                                         | (6)       |
| NC_008522           | Finch circovirus                                        | (6)       |
| NC_026945           | Zebra finch circovirus                                  | (7)       |
| NC_007220           | Duck circovirus                                         | (8)       |
| NC_025247           | Swan circovirus                                         | (9)       |
| NC_015399           | Barbel circovirus                                       | (10)      |
| NC_025246           | Wels catfish circovirus                                 | (11)      |
| NC_001792           | Porcine circovirus 1                                    | (12)      |
| NC_005148           | Porcine circovirus 2                                    | (12)      |
| NC_020904           | Canine circovirus 1                                     | (13)      |
| NC_023885           | Mink circovirus                                         | (14)      |
| NC_028045           | Mexican free-tailed bat circovirus                      | (15)      |
| NC_031753           | Porcine circovirus 3                                    | (16)      |
| GQ404851            | Chimpanzee stool avian-like circovirus Chimp17          | (17)      |
| JQ814849            | Bat associated circovirus 3                             | (18)      |
| KJ641711            | Bat associated circovirus 8                             | (19)      |
| KT783484            | Bat associated circovirus 4                             | (20)      |
| KJ641724            | Bat associated circovirus 6                             | (19)      |
| KJ641711            | Bat associated circovirus 8                             | (19)      |
| KJ641723            | Bat associated circovirus 7                             | (19)      |
| <b>Cyclovirus</b>   |                                                         |           |
| KR902499            | Cyclovirus Equ1                                         | (30)      |
| HQ738634            | Cyclovirus PKbeef23                                     | (21)      |
| GQ404857            | Cyclovirus TN25                                         | (17)      |
| KF031471            | Cyclovirus VN isolate cs1                               | (22)      |
| NC_021568           | Human cyclovirus VS5700009                              | (23)      |
| KJ641714            | Bat circovirus isolate BtRp-CV-14/GD2012                | (18)      |
| KJ641728            | Bat associated cyclovirus 13 isolate BtPa-CV-2/NX2013   | (18)      |
| GQ404855            | Cyclovirus NG14                                         | (17)      |
| GQ404847            | Cyclovirus PK5510                                       | (17)      |
| KC512920            | Dragonfly cyclovirus 8                                  | (24)      |
| KJ641717            | Bat associated cyclovirus 11 isolate BtM spp.-CV/GD2012 | (18)      |
| JF938080            | Bat circovirus ZS/China/2011 isolate YN-BtCV-3          | (25)      |
| GQ404849            | Cyclovirus Chimp11                                      | (17)      |
| KC512919            | Dragonfly cyclovirus 7                                  | (24)      |
| HQ738643            | CyCV-NG-chicken-8                                       | (21)      |
| GQ404846            | Cyclovirus PK5222                                       | (17)      |
| GQ404844            | Cyclovirus PK5006                                       | (17)      |
| HQ738636            | Cyclovirus PKgoat11                                     | (21)      |
| KM382269            | Bat circovirus POA/2012/II                              | (20)      |
| HQ638049            | Dragonfly cyclovirus isolate DfCyV-A9                   | (26)      |
| KC512918            | Dragonfly cyclovirus 6                                  | (24)      |
| LC018134            | Cyclovirus TsCyV-1_JP-NUBS-2014                         | (27)      |
| HM228874            | Bat cyclovirus GF-4c                                    | (28)      |
| JF938081            | Bat associated cyclovirus 3 isolate YN-BtCV-4           | (25)      |
| HQ738637            | Cyclovirus bat/USA/2009                                 | (21)      |
| KJ641712            | Bat associated cyclovirus 6                             | (18)      |
| GQ404845            | Cyclovirus PK5034                                       | (17)      |
| JX185426            | Dragonfly cyclovirus 5                                  | (29)      |
| KJ831064            | Cyclovirus SL-108277                                    | (18)      |
| JF938079            | Bat associated cyclovirus 2 isolate YN-BtCV-2           | (25)      |
| KJ641715            | Bat associated cyclovirus 8 isolate BtRp-CV-52/GD2012   | (18)      |
| GQ404854            | Cyclovirus NG12                                         | (17)      |
| KJ641720            | Bat associated cyclovirus 9 isolate BtTp-CV-2/GX2012    | (18)      |
| <b>Unclassified</b> |                                                         |           |
| GQ404856            | Human stool-associated circular virus NG13              | (17)      |

Footnote: \*First report, or review describing history of discovery.

## References

1. **Niagro FD, Forsthoefel AN, Lawther RP, Kamalanathan L, Ritchie BW, Latimer KS, Lukert PD.** 1998. Beak and feather disease virus and porcine circovirus genomes: intermediates between the geminiviruses and plant circoviruses. *Arch Virol* **143**:1723-1744.
2. **Mankertz A, Hattermann K, Ehlers B, Soike D.** 2000. Cloning and sequencing of columbid circovirus (coCV), a new circovirus from pigeons. *Arch Virol* **145**:2469-2479.
3. **Todd D, Weston J, Ball NW, Borghmans BJ, Smyth JA, Gelmini L, Lavazza A.** 2001. Nucleotide sequence-based identification of a novel circovirus of canaries. *Avian Pathol* **30**:321-325.
4. **Johne R, Fernandez-de-Luco D, Hofle U, Muller H.** 2006. Genome of a novel circovirus of starlings, amplified by multiply primed rolling-circle amplification. *J Gen Virol* **87**:1189-1195.
5. **Stewart ME, Perry R, Raidal SR.** 2006. Identification of a novel circovirus in Australian ravens (*Corvus coronoides*) with feather disease. *Avian Pathol* **35**:86-92.
6. **Todd D, Scott AN, Fringuelli E, Shivraprasad HL, Gavier-Widen D, Smyth JA.** 2007. Molecular characterization of novel circoviruses from finch and gull. *Avian Pathol* **36**:75-81.
7. **Rinder M, Schmitz A, Peschel A, Korbel R.** 2015. Complete genome sequence of a novel circovirus from zebra finch. *Genome Announc* **3**.
8. **Banda A, Galloway-Haskins RI, Sandhu TS, Schat KA.** 2007. Genetic analysis of a duck circovirus detected in commercial Pekin ducks in New York. *Avian Dis* **51**:90-95.
9. **Halami MY, Nieper H, Muller H, Johne R.** 2008. Detection of a novel circovirus in mute swans (*Cygnus olor*) by using nested broad-spectrum PCR. *Virus Res* **132**:208-212.
10. **Lorincz M, Csagola A, Farkas SL, Szekely C, Tuboly T.** 2011. First detection and analysis of a fish circovirus. *J Gen Virol* **92**:1817-1821.
11. **Lorincz M, Dan A, Lang M, Csaba G, Toth AG, Szekely C, Csagola A, Tuboly T.** 2012. Novel circovirus in European catfish (*Silurus glanis*). *Arch Virol* **157**:1173-1176.
12. **Ellis J.** 2014. Porcine circovirus: a historical perspective. *Vet Pathol* **51**:315-327.
13. **Li L, McGraw S, Zhu K, Leutenegger CM, Marks SL, Kubiski S, Gaffney P, Dela Cruz FN, Jr., Wang C, Delwart E, Pesavento PA.** 2013. Circovirus in tissues of dogs with vasculitis and hemorrhage. *Emerg Infect Dis* **19**:534-541.
14. **Lian H, Liu Y, Li N, Wang Y, Zhang S, Hu R.** 2014. Novel circovirus from mink, China. *Emerg Infect Dis* **20**:1548-1550.
15. **Lima FE, Cibulski SP, Dall Bello AG, Mayer FQ, Witt AA, Roehe PM, d'Azevedo PA.** 2015. A Novel Chiropteran Circovirus Genome Recovered from a Brazilian Insectivorous Bat Species. *Genome Announc* **3**.
16. **Palinski R, Pineyro P, Shang P, Yuan F, Guo R, Fang Y, Byers E, Hause BM.** 2017. A Novel Porcine Circovirus Distantly Related to Known Circoviruses Is Associated with Porcine Dermatitis and Nephropathy Syndrome and Reproductive Failure. *J Virol* **91**.

17. **Li L, Kapoor A, Slikas B, Bamidele OS, Wang C, Shaukat S, Masroor MA, Wilson ML, Ndjango JB, Peeters M, Gross-Camp ND, Muller MN, Hahn BH, Wolfe ND, Triki H, Bartkus J, Zaidi SZ, Delwart E.** 2010. Multiple diverse circoviruses infect farm animals and are commonly found in human and chimpanzee feces. *J Virol* **84**:1674-1682.
18. **Wu Z, Ren X, Yang L, Hu Y, Yang J, He G, Zhang J, Dong J, Sun L, Du J, Liu L, Xue Y, Wang J, Yang F, Zhang S, Jin Q.** 2012. Virome analysis for identification of novel mammalian viruses in bat species from Chinese provinces. *J Virol* **86**:10999-11012.
19. **Wu Z, Yang L, Ren X, He G, Zhang J, Yang J, Qian Z, Dong J, Sun L, Zhu Y, Du J, Yang F, Zhang S, Jin Q.** 2016. Deciphering the bat virome catalog to better understand the ecological diversity of bat viruses and the bat origin of emerging infectious diseases. *Isme j* **10**:609-620.
20. **Lima FE, Cibulski SP, Dos Santos HF, Teixeira TF, Varela AP, Roehe PM, Delwart E, Franco AC.** 2015. Genomic characterization of novel circular ssDNA viruses from insectivorous bats in Southern Brazil. *PLoS One* **10**:e0118070.
21. **Li L, Shan T, Soji OB, Alam MM, Kunz TH, Zaidi SZ, Delwart E.** 2011. Possible cross-species transmission of circoviruses and cycloviruses among farm animals. *J Gen Virol* **92**:768-772.
22. **Tan le V, van Doorn HR, Nghia HD, Chau TT, Tu le TP, de Vries M, Canuti M, Deijns M, Jebbink MF, Baker S, Bryant JE, Tham NT, NT BK, Boni MF, Loi TQ, Phuong le T, Verhoeven JT, Crusat M, Jeeninga RE, Schultsz C, Chau NV, Hien TT, van der Hoek L, Farrar J, de Jong MD.** 2013. Identification of a new cyclovirus in cerebrospinal fluid of patients with acute central nervous system infections. *MBio* **4**:e00231-00213.
23. **Smits SL, Zijlstra EE, van Hellemond JJ, Schapendonk CM, Bodewes R, Schurch AC, Haagmans BL, Osterhaus AD.** 2013. Novel cyclovirus in human cerebrospinal fluid, Malawi, 2010-2011. *Emerg Infect Dis* **19**.
24. **Dayaram A, Potter KA, Moline AB, Rosenstein DD, Marinov M, Thomas JE, Breitbart M, Rosario K, Arguello-Astorga GR, Varsani A.** 2013. High global diversity of cycloviruses amongst dragonflies. *J Gen Virol* **94**:1827-1840.
25. **Ge X, Li J, Peng C, Wu L, Yang X, Wu Y, Zhang Y, Shi Z.** 2011. Genetic diversity of novel circular ssDNA viruses in bats in China. *J Gen Virol* **92**:2646-2653.
26. **Rosario K, Marinov M, Stainton D, Kraberger S, Wiltshire EJ, Collings DA, Walters M, Martin DP, Breitbart M, Varsani A.** 2011. Dragonfly cyclovirus, a novel single-stranded DNA virus discovered in dragonflies (Odonata: Anisoptera). *J Gen Virol* **92**:1302-1308.
27. **Sato G, Kawashima T, Kiuchi M, Tohya Y.** 2015. Novel cyclovirus detected in the intestinal contents of Taiwan squirrels (*Callosciurus erythraeus taiwanensis*). *Virus Genes* **51**:148-151.
28. **Li L, Victoria JG, Wang C, Jones M, Fellers GM, Kunz TH, Delwart E.** 2010. Bat guano virome: predominance of dietary viruses from insects and plants plus novel mammalian viruses. *J Virol* **84**:6955-6965.
29. **Rosario K, Dayaram A, Marinov M, Ware J, Kraberger S, Stainton D, Breitbart M, Varsani A.** 2012. Diverse circular ssDNA viruses discovered in dragonflies (Odonata: Epiprocta). *J Gen Virol* **93**:2668-2681.
30. **Li L, Giannitti F, Low J, Keyes C, Ullmann LS, Deng X, Aleman M, Pesavento PA, Pusterla N, Delwart E.** 2015. Exploring the virome of diseased horses. *J Gen Virol* **96**:2721-2733.
